# Supplementary material for: Prevalence of oral rehydration therapy use and associated factors among under-five children with diarrhea in Dangure, Benishangul Gumuz Region, Ethiopia/2018
Source: PubMed Central journal article supplement (PMC6354353; doi:10.1186/s13104-019-4078-6), 2019-01-30
Supplement: 13104_2019_4078_MOESM1_ESM.pdf [file 13104_2019_4078_MOESM1_ESM.pdf]

## English Version Questionnaires

| S.No | Question                            | Option                                                                                                | Remark |
|------|-------------------------------------|-------------------------------------------------------------------------------------------------------|--------|
| 101  | Age of caregiver ( in years)        | -----                                                                                                 |        |
| 102  | Sex of caregivers                   | 1. Male<br>2. Female                                                                                  |        |
| 103  | Religion                            | 1.Orthodox<br>2. Muslim<br>3. Catholic<br>4. Protestant<br>5. Other (specify-----)                    |        |
| 104  | Ethnicity                           | 1.Gumuze<br>2.Shinasha<br>3.Amhara<br>4.Oromo<br>5. Others.....                                       |        |
| 105  | Female caregivers educational level | 1.No formal education<br>2.Primary school<br>3.Secondary school<br>4. College and above               |        |
| 106  | Male caregivers educational level   | 1.No formal education<br>2.Primary school<br>3.Secondary school<br>4. College and above               |        |
| 107  | Occupation of female caregivers     | 1. House wife<br>2. farmer<br>3. Governmental employee<br>4. Merchant<br>5. Other specify.....        |        |
| 108  | Relation of caregiver to client     | 1. Mother<br>2. Father<br>3. Sibling<br>4. Grand mother<br>5. Grand father<br>6. Other, specify ..... |        |
| 109  | Family size                         | -----                                                                                                 |        |
| 110  | Monthly income                      | -----                                                                                                 |        |
| 111  | Residence                           | 1. Rural<br>2. Urban                                                                                  |        |

|     |                                                              |                                                                                                                                                            |  |
|-----|--------------------------------------------------------------|------------------------------------------------------------------------------------------------------------------------------------------------------------|--|
| 112 | Marital status                                               | 1a. Single<br>2. Married<br>3. Divorced<br>4. Widowed                                                                                                      |  |
| 113 | If married, what does your Husband/ wife do?                 | 1. Governmental employee<br>2. farmer<br>3. Merchant,<br>4. Others                                                                                         |  |
| 114 | How old is your child (in months)?                           | -----                                                                                                                                                      |  |
| 115 | How many children under five do you have in this house hold? | -----                                                                                                                                                      |  |
| 116 | Distance of home from health facility in hour?               | 1. Less than 1 hour<br>2. 1 hour and above                                                                                                                 |  |
| 117 | From where do you heard about ORT?                           | 1. Health Extension Worker<br>2. Health center<br>3. Radio<br>4. Friends / relatives<br>5. Other specify .....                                             |  |
| 118 | Do you know the importance of giving ORT to your child?      | 1. To increase the diarrhea<br>2. To decrease the diarrhea<br>3. To prevent dehydration<br>4. No idea                                                      |  |
| 119 | Do you know when to start ORT?                               | 1. Yes<br>2. No                                                                                                                                            |  |
| 120 | How do you prepare ORS at home?                              | 1. 1 sachet of ORS -300 mls ( 1 coke bottle) of water<br>2. 1 sachet of ORS -500 mls ( 1 small size of mineral bottle) of water<br>3. 1 sachet of ORS -600 |  |

|     |                                                                                                                                                          |                                                                                                                                                                                                                                                    |  |
|-----|----------------------------------------------------------------------------------------------------------------------------------------------------------|----------------------------------------------------------------------------------------------------------------------------------------------------------------------------------------------------------------------------------------------------|--|
|     |                                                                                                                                                          | mls<br>( 2 coke bottle) of water<br>4. 1 sachet of ORS -<br>1000mls ( 1 liter) of<br>water<br>5.1 sachet of ORS -<br>1500mls (1.5 liter) of<br>water<br>6. 1 sachet of ORS -<br>2000mls ( 2 liters or<br>large size of mineral<br>bottle) of water |  |
| 121 | When do you use the prepared ORS?                                                                                                                        | 1. within 24 hrs. ( 1 day)<br>2. within 48 hrs. (2<br>days)<br>3. within 72 hrs. (3<br>days)<br>4. within 96 hrs. (4<br>days)<br>5. Other, specify                                                                                                 |  |
| 122 | Do you have access to ORS?                                                                                                                               | 1. Yes<br>2. No                                                                                                                                                                                                                                    |  |
| 123 | Did you give recommended Home-made fluid to a child with diarrhea?                                                                                       | 1. Yes<br>2. No                                                                                                                                                                                                                                    |  |
| 124 | If yes, what available recommended Home-made fluid / home base Oral Rehydration fluid can be given to a child with diarrhea? ( Tick as many as possible) | 1. Sugar with water<br>2. Salt with water<br>3. Rice water<br>4. Soup<br>5. not used<br>6. Other, specify.....                                                                                                                                     |  |
| 125 | Do you have previous experience in using ORT                                                                                                             | 1. Yes<br>2. No                                                                                                                                                                                                                                    |  |
| 126 | Do you have behavior of seeking treatment from health facilities                                                                                         | 1. Yes<br>2. No                                                                                                                                                                                                                                    |  |
| 127 | Do you have ORS sachet at home?                                                                                                                          | 1. Yes<br>2. No                                                                                                                                                                                                                                    |  |

|     |                                                                                 |                                                                                                                                                                                                                     |  |
|-----|---------------------------------------------------------------------------------|---------------------------------------------------------------------------------------------------------------------------------------------------------------------------------------------------------------------|--|
| 128 | What do you think are the cause of Diarrhea? ( Tick as many as possible)        | <ol style="list-style-type: none"> <li>1.Tooth eruption</li> <li>2.Evil Eye</li> <li>3.Weaning</li> <li>4.contaminated food/water</li> <li>5.No idea about the cause</li> </ol>                                     |  |
| 129 | What are the numbers of signs identified to recognize the severity of diarrhea? | <ol style="list-style-type: none"> <li>1. fever,</li> <li>2 .repeated vomiting</li> <li>3. many watery stools</li> <li>4. not able to eat or take fluid,</li> <li>5. blood in the stool</li> <li>6 non</li> </ol>   |  |
| 130 | What are the numbers of signs identified to recognize dehydration               | <ol style="list-style-type: none"> <li>1. excessive thirst,</li> <li>2. sunken eye</li> <li>3. reduced urine output</li> <li>4. poor skin turgor</li> <li>5. restlessness</li> <li>6. Other specify.....</li> </ol> |  |
